# Supplementary material for: The Clinical Value of miRNA-21 in Cervical Cancer: A Comprehensive Investigation Based on Microarray Datasets
Source: Research Square preprint supplement (doi:10.21203/rs.3.rs-1131670/v1), 2021-12-13
Supplement: Supplementary file 1 [file 9ea05485b15ca7aa5a9febb9.docx]

**Supplemental** **Table S1.** Promising 41 target genes of miR-21 in CC obtained from the intersection of GEPIA2 and miRWalk2.0.

**Supplemental** **Table S2.** The GO enrichment analysis of predicted target genes.

**Supplemental** **Table S3.** The KEGG enrichment analysis of predicted target genes.

**Table S1**. Promising 41 target genes of miR-21 in CC obtained from the intersection of GEPIA2 and miRWalk2.0.

| **Sources of genes** | **Genes** | | | | | |
| --- | --- | --- | --- | --- | --- | --- |
| GEPIA and miRWalk | APBB2 | LONRF2 | MYCL | FKBP5 | SRL | FAM13A |
| PTBP3 | SKI | PEG3 | MAF | KIAA1462 | WWC2 |
| TIMP3 | SKP2 | KLF6 | PFKM | SOX5 | PLAG1 |
| SACM1 L | MATN2 | RTKN2 | PIKFYVE | ZC3H6 | AKAP6 |
| PHF2 | MYOZ3 | LRRC8B | RASSF8 | GFRA1 | EPAS1 |
| SOX2 | SLC19A2 | FRMD3 | NRP1 | ARHGEF7 | MYO5B |
| TBX2 | RAB27B | CREB5 | LRP6 | ZDHHC15 | ZNF367 |
|  | MSH2 | ZNF708 | BCL11A | TGFBI |  |  |

Note: TCGA, The Cancer Genome Atlas.

**Table S2.** The GO enrichment analysis of predicted target genes.

| GO ID | GO term | Count (%) | | Gene symbol | *P* value |
| --- | --- | --- | --- | --- | --- |
| Biological process | | | | | |
| GO:0035265 | organ growth | | 5 | WWC2/PLAG1/MATN2/AKAP6/TBX2 | 9.08E-05 |
| GO:0051216 | cartilage development | | 5 | MAF/SOX5/MATN2/LRP6/TGFBI | 0.000102 |
| GO:0001654 | eye development | | 6 | SKI/MAF/SOX2/NRP1/TBX2/LRP6 | 0.000148 |
| GO:0022612 | gland morphogenesis | | 4 | PLAG1/NRP1/TBX2/LRP6 | 0.00015 |
| Cellular component | | | | | |
| GO:0042827 | platelet dense granule | | 2 | TIMP3/RAB27B | 0.00095 |
| GO:0005604 | basement membrane | | 3 | TIMP3/MATN2/TGFBI | 0.001163 |
| GO:0016529 | sarcoplasmic reticulum | | 2 | SRL/AKAP6 | 0.010496 |
| GO:0005667 | transcription regulator complex | | 4 | SKI/EPAS1/SOX2/TBX2 | 0.012501 |
| GO:0005901 | caveola | | 2 | AKAP6/LRP6 | 0.013182 |
| Molecular function | | | | | |
| GO:0001228 | DNA-binding transcription activator activity, RNA polymerase II-specific | | 7 | MYCL/MAF/KLF6/PLAG1/EPAS1/SOX2/TBX2 | 8.21E-05 |
| GO:0001216 | DNA-binding transcription activator activity | | 7 | MYCL/MAF/KLF6/PLAG1/EPAS1/SOX2/TBX2 | 8.32E-05 |
| GO:0034593 | phosphatidylinositol bisphosphate phosphatase activity | | 2 | SACM1 L/PIKFYVE | 0.001413 |
| GO:0052866 | phosphatidylinositol phosphate phosphatase activity | | 2 | SACM1 L/PIKFYVE | 0.001948 |

**Notes**: Only the top 4 are presented in the table**.**

**Table S3**. The KEGG enrichment analysis of predicted target genes.

| KEGG ID | KEGG term | Count (%) | Gene symbol | *P* |
| --- | --- | --- | --- | --- |
| hsa00562 | Inositol phosphate metabolism | 2 | SACM1 L/PIKFYVE | 0.011237 |
| hsa04070 | Phosphatidylinositol signaling system | 2 | SACM1 L/PIKFYVE | 0.019291 |
| hsa04928 | Parathyroid hormone synthesis, secretion, and action | 2 | CREB5/LRP6 | 0.022786 |
| hsa04922 | Glucagon signaling pathway | 2 | PFKM/CREB5 | 0.02319 |
| hsa04152 | AMPK signaling pathway | 2 | PFKM/CREB5 | 0.028703 |
| hsa04915 | Estrogen signaling pathway | 2 | FKBP5/CREB5 | 0.037117 |
| hsa04150 | mTOR signaling pathway | 2 | SKP2/LRP6 | 0.045832 |
